1 **Chromatin-associated microprocessor assembly is regulated by PRP40, the U1 snRNP**  
2 **auxiliary protein**

3

4 Agata Stepień<sup>1,a,b,\*</sup>, Jakub Dolata<sup>1\*</sup>, Tomasz Gulanicz<sup>1,c</sup>, Dawid Bielewicz<sup>1,b</sup>, Mateusz  
5 Bajczyk<sup>1</sup>, Dariusz J. Smolinski<sup>2,3</sup>, Zofia Szweykowska-Kulinska<sup>1@</sup>, Artur Jarmolowski<sup>1@</sup>

6

7 <sup>1</sup> Department of Gene Expression, Institute of Molecular Biology and Biotechnology, Faculty  
8 of Biology, Adam Mickiewicz University, Poznan, Poland

9 <sup>2</sup> Department of Cellular and Molecular Biology, Nicolaus Copernicus University, Torun,  
10 Poland

11 <sup>3</sup> Centre For Modern Interdisciplinary Technologies, Nicolaus Copernicus University, Torun,  
12 Poland

13

14 <sup>a</sup> current address: Department of Molecular and Cellular Biology, Institute of Molecular  
15 Biology and Biotechnology, Faculty of Biology, Adam Mickiewicz University, Poznan, Poland

16 <sup>b</sup> current address: Wielkopolska Center of Advanced Technologies, Poznan, Poland

17 <sup>c</sup> current address: Centre For Modern Interdisciplinary Technologies, Nicolaus Copernicus  
18 University, Torun, Poland

19

20

21 \* These authors contributed equally to this work.

22 @ corresponding authors

23

24 **Abstract**

25 Cotranscriptional processing of RNA polymerase II-generated primary transcripts is a well-  
26 documented phenomenon. We recently showed that in plants, miRNA biogenesis is also a  
27 cotranscriptional event. Here, we report that Arabidopsis PRP40, the U1 snRNP auxiliary  
28 protein, positively regulates the recruitment of SE, the core component of the plant  
29 microprocessor, to miRNA genes. The association of DCL1, the microprocessor  
30 endoribonuclease, with chromatin was altered in *prp40ab* mutant plants. Impaired  
31 cotranscriptional microprocessor assembly was accompanied by RNA polymerase II  
32 accumulation at miRNA genes and retention of miRNA precursors at their transcription sites  
33 in the *prp40ab* mutant plants. We show that cotranscriptional microprocessor assembly,  
34 regulated by AtPRP40, positively affects RNAPII transcription of miRNA genes and is  
35 important to reach the correct levels of produced miRNAs.

## 36 Introduction

37 microRNAs (miRNAs) are single-stranded, usually 21 nt long, RNAs that regulate basic  
38 developmental processes as well as plant responses to constant fluctuations in  
39 environmental conditions <sup>1-4</sup>. Therefore, miRNA production has to be tightly controlled at  
40 multiple levels <sup>5,6</sup>. Plant miRNA genes (*MIRs*) are transcribed by RNA polymerase II (RNAPII)  
41 to generate primary precursors (pri-miRNAs) that are cleaved to pre-miRNAs (hairpin  
42 structures) and further to miRNA/miRNA\* duplexes. In plants, both steps of miRNA  
43 biogenesis are carried out in the nucleus by the RNase III-type ribonuclease DCL1 (Dicer-like  
44 1) <sup>7</sup>. Depending on the pri-miRNA structure, DCL1 generates the first cut near the base of the  
45 hairpin structure (base-to-loop processing, BTL) or starts from the hairpin loop (loop-to-base  
46 processing, LTB) <sup>8,9</sup>. DCL1 is assisted by SE (SERRATE) and HYL1 (HYPONASTIC  
47 LEAVES 1) for accurate and efficient activity <sup>10-12</sup>. These three proteins, DCL1, SE and  
48 HYL1, form the core of the plant microprocessor.

49 Similar to that of animals, plant pri-miRNA cleavage was recently reported to occur  
50 cotranscriptionally <sup>13,14</sup>. Two components of the microprocessor, DCL1 and SE, are known to  
51 be associated with chromatin. The association of DCL1 with *MIRs* is mediated by the  
52 Mediator and Elongator complexes <sup>15,16</sup>, while SE was found to bind and regulate the  
53 transcription of intronless genes<sup>17</sup>. However, the cotranscriptional mechanism of the  
54 microprocessor assembly is still unclear and requires investigation.

55 We previously showed that the SE and U1 snRNP proteins are responsible for the  
56 communication between the microprocessor and the splicing machinery <sup>18</sup>. Among the U1  
57 snRNP partners of SE, PRP40 is particularly interesting. Since U1 snRNP is recruited  
58 cotranscriptionally to intron-containing genes in yeast shortly downstream from the 5' splice  
59 site, U1 snRNP elements have been considered potential players in the well-established  
60 crosstalk between the splicing and transcription machinery <sup>19-25</sup>. The reported direct  
61 interaction of yeast PRP40p with the RNAPII C-terminal domain (CTD) <sup>26</sup> indicates that this  
62 protein is a good candidate for such communication. Plant and animal PRP40 homologs can  
63 also interact with CTD <sup>27-29</sup>. However, the published data suggest that the main role of

64 PRP40 is stabilization of U1 snRNP by the interactions of PRP40 with other U1 components  
65 and modulation of alternative splicing<sup>26,30–34</sup>, and its possible function in the cotranscriptional  
66 recruitment of different macromolecular complexes to RNAPII is still an open question.

67 We previously suggested that PRP40 may be involved in cotranscriptional  
68 microprocessor assembly due to the direct interaction between AtPRP40 and SE<sup>18</sup>. Here, we  
69 found that the levels of almost half of the polyadenylated pri-miRNAs were affected in  
70 *prp40ab* (the majority of which were downregulated). However, in parallel, we observed  
71 increased levels of chromatin-associated, non-poly(A) tailed transcripts. Interestingly, mature  
72 miRNAs, on average, showed only slightly upregulated expression in *prp40ab*. We  
73 demonstrate that the higher accumulation of RNAPII along pre-miRNA genes correlates with  
74 the altered recruitment of microprocessor components, e.g., SE and DCL1, to *MIRs*. Our  
75 results show that in plants, PRP40 is involved in the coordination of the microprocessor  
76 assembly on pri-miRNAs while they are synthesized by RNAPII.

77

## 78 **Results**

### 79 **AtPRP40 is important for *Arabidopsis thaliana* development**

80 The *A. thaliana* genome encodes three PRP40 genes<sup>35</sup> that show differences in expression  
81 levels in various tissues and developmental stages (Extended Data Fig. 1). AtPRP40a  
82 showed the highest expression, whereas AtPRP40c was barely expressed in all tested  
83 samples. In our previous studies, we identified AtPRP40a and AtPRP40b as proteins  
84 involved in the interplay between miRNA production and the splicing of miRNA precursors<sup>18</sup>.  
85 Interestingly, when we assessed the colocalization of AtPRP40b and U1 snRNA, a core  
86 component of U1 snRNP, we found low colocalization coefficients (Extended Data Fig. 2).  
87 This finding suggests an additional activity of AtPRP40 beyond the U1 snRNP complex.

88 Single mutants of each AtPRP40 did not differ from WT plants (Extended Data Fig.  
89 3a). However, the double *prp40ab* mutant showed delayed growth (Extended Data Fig. 3b,  
90 c). Interestingly, the AtPRP40a mRNA level in the single *prp40b* mutant was elevated  
91 compared to that in the WT plants, and similarly, *AtPRP40b* mRNA expression was higher in

92 the *prp40a* mutant than in the WT plants (Extended Data Fig. 4a). This result was also  
93 confirmed at the protein level using antibodies recognizing AtPRP40b (Extended Data Fig.  
94 4b). Notably, the level of AtPRP40c mRNA was not affected in *prp40a*, *prp40b* or *prp40ab*  
95 (Extended Data Fig. 4a). Since we were not able to obtain homozygotes of the triple  
96 *prp40abc* mutant (most likely due to a relatively short distance between the *AtPRP40B* and  
97 *AtPRP40C* genes, approximately 54 kb), for further analyses, we used the double *prp40ab*  
98 mutant. Interestingly, we found that the crosstalk between SE and AtPRP40a and AtPRP40b  
99 is also crucial for plant development, as the mutation of *SE* and inactivation of *AtPRP40A*  
100 and *AtPRP40B* led to embryo lethality (Extended Data Fig. 5). Notably, we did not observe  
101 this phenomenon after crossing *prp40ab* with *hyl1-2*, a mutant of another core  
102 microprocessor component, HYL1. This finding prompted us to analyze the crosstalk  
103 between the SE and AtPRP40 proteins and its role in miRNA biogenesis in plants.

104

#### 105 **AtPRP40 mediates the SE association with RNAPII and MIRs**

106 Since SE was shown to associate with RNAPII <sup>17</sup>, we investigated whether this contact is  
107 regulated by AtPRP40. We performed colocalization analyses and utilized the proximity-  
108 ligation assay (PLA). These experiments showed the close proximity and colocalization of SE  
109 and AtPRP40b in the plant cells (Fig. 1a, Extended Data Fig. 6), and the close proximity and  
110 colocalization of SE with RNAPII phosphorylated at both Ser5 (P-Ser5-RNAPII) and Ser2 (P-  
111 Ser2-RNAPII) (Fig. 1b, Extended Data Fig. 7). The colocalization coefficients calculated for  
112 SE and both phosphorylated forms of RNAPII were significantly lower in the *prp40ab* mutant  
113 plants (Extended Data Fig. 7b), and the PLA signal numbers also decreased in *prp40ab* (Fig.  
114 1b), indicating that AtPRP40 mediates the association of SE with RNAPII.

115 In contrast, the colocalization and close proximity of AtPRP40b with RNAPII do not  
116 depend on SE, since we did not observe any change in the colocalization coefficient values  
117 or the observed PLA signals in *se-2* (Extended Data Fig. 8, Fig. 1c).

118 Moreover, using an *in vitro* pull-down assay we showed that AtPRP40b is required for  
119 the association of SE with the C-terminal domain (CTD) of both the unphosphorylated and

120 phosphorylated forms of RNAPII (Fig. 1d). In this experiment, we also generated the SE  
121 protein lacking forty C-terminal amino acids (SE $\Delta$ 681-720) that corresponds to the SE variant  
122 expressed in the *se-2* mutant. We previously showed that such a truncated SE protein  
123 cannot bind AtPRP40b<sup>18</sup>; thus, we used this SE variant as a negative control. Indeed, we  
124 observed SE-AtPRP40b-CTD complex formation only in the presence of the full-length SE  
125 but not when the SE $\Delta$ 681-720 shortened variant of SE was used (Fig. 1d).

126 Furthermore, we performed a ChIP experiment to determine whether AtPRP40 is  
127 involved in SE recruitment to miRNA genes, and we found lower SE accumulation on all  
128 *MIRs* tested in *prp40ab* than in the wild-type plants (Fig. 2, Extended Data Fig. 9).

129 Our data indicate that AtPRP40 regulates the recruitment of SE to RNAPII and *MIRs*  
130 and may be involved in the regulation of miRNA biogenesis.

131

### 132 **AtPRP40 is involved in the transcription of pri-miRNAs**

133 To test the role of AtPRP40 in miRNA production, we applied our high-throughput RT-qPCR  
134 platform, mirEX 2.0, which allowed us to analyze the expression levels of 297 *A. thaliana* pri-  
135 miRNAs<sup>36,37</sup>. The levels of 46% polyadenylated pri-miRNAs were significantly changed in  
136 *prp40ab*, (121 out of 261 pri-miRNAs which we were able to detect) (Fig. 3a). The vast  
137 majority (71%) of affected precursors showed downregulated expression. The affected pri-  
138 miRNAs belong to both the low- and high-expression pri-miRNAs; thus, AtPRP40 protein  
139 activity does not depend on the pri-miRNA expression level (Extended Data Fig. 10a).

140 Moreover, we did not find any relationship between the expression pattern in *prp40ab* and  
141 the presence of introns in *MIR* genes (Extended Data Fig. 10b). To determine how this  
142 decreased level of polyadenylated pri-miRNAs in *prp40ab* mutants affects mature miRNAs,  
143 we performed small RNA sequencing and compared the miRNA levels of the WT and  
144 *prp40ab* plants. Surprisingly, the levels of most of the mature miRNAs were not changed or  
145 were even slightly upregulated in the *prp40ab* mutants (Fig. 3b). The affected miRNAs were  
146 mostly highly expressed miRNAs (Extended Data Fig. 10c). Interestingly, the miRNAs  
147 showing no change or upregulated expression correspond mainly to those poly(A) pri-

148 miRNAs that showed lower levels in *prp40ab* (Fig. 3c, d). Furthermore, we investigated  
149 whether precision of miRNA production is impaired in *prp40ab*, and we did not observe any  
150 bias in the *prp40ab* mutants compared to the WT plants (Extended Data Fig. 10d). To  
151 elucidate this unexpected phenomenon, we randomly selected a group of *MIRs* (including  
152 polyadenylated *MIR* transcripts with upregulated, downregulated and unaffected levels) and  
153 tested their expression levels using cDNA templates synthesized with random hexamer  
154 primers instead of oligo d(T), which was used to monitor the levels of poly(A)-tailed pri-  
155 miRNAs. Interestingly, none of these molecules were significantly changed (Extended Data  
156 Fig. 10e). We wanted to exclude the possibility that the effect on poly(A)-tailed pri-miRNA  
157 levels was due to the change in the amount of DCL1, a major component of the  
158 microprocessor. To this end we performed the western blot analysis in WT and the *prp40ab*  
159 plants. The levels of DCL1 and SE, a second key subunit of the microprocessor, were not  
160 altered in *prp40ab* (Extended Data Fig. 11). However, we observed an increased level of the  
161 double-stranded RNA-binding protein HYL1 in *prp40ab*.

162 Thus, these results suggest that the lack of Arabidopsis PRP40a and b affects the  
163 accumulation of polyadenylated pri-miRNAs, but the final effect on the production of mature  
164 miRNA in *prp40ab* mutants is rather minor.

165

### 166 **AtPRP40 affects RNAPII and DCL1 occupancy on *MIR* genes**

167 The discordance between the levels of poly(A)-tailed pri-miRNAs and the total amount of  
168 *MIR* transcripts might be due to improper transcription termination and/or changes in miRNA  
169 precursor processing. Whole-genome RNAPII profiling in the *prp40ab* mutant revealed a  
170 higher level of RNAPII on *MIRs* with a significant increase in pre-miRNA coding regions and  
171 further in 3' ends (Fig. 4a, b, Extended Data Fig. 12a, c). Additionally, the accumulation of  
172 RNAPII along miRNA genes in *prp40ab* in the vast majority of cases correlated with the  
173 reduced level of polyadenylated pri-miRNAs (Fig. 4c), and the pri-miRNA coding regions with

174 increased RNAPII occupancy had significantly lower levels of the corresponding poly(A) pri-  
175 miRNAs (Fig. 4d).

176 Previously, DCL1 was detected on at least some *MIRs*<sup>16</sup>; thus, we investigated how  
177 the lack of the AtPRP40a and b proteins affects DCL1 accumulation on chromatin. We  
178 observed alteration of the DCL1 level in pre-miRNA coding regions (Fig. 5a, Extended Data  
179 Fig. 12b, c). On average, DCL1 occupancy was increased; however, there was a group of  
180 *MIRs* with unchanged or even decreased DCL1 levels. We recently showed that  
181 cotranscriptional processing of pri-miRNAs differs depending on the way precursors are  
182 cleaved at the first step<sup>14</sup>. For the loop-to-base (LTB) type of cleavage, both processing  
183 steps occur cotranscriptionally, whereas for the base-to-loop (BTL) type of processing, the  
184 first step is cotranscriptional, but the second occurs post-transcriptionally in the nucleoplasm.  
185 We found that LTB-type *MIRs*, but not BTL-type *MIRs*, showed increased DCL1 occupancy  
186 in *prp40ab* (Fig. 5b, c).

187 Both RNAPII and DCL1 ChIP-seq datasets strongly indicate that AtPRP40 proteins  
188 are involved in the cotranscriptional regulation of *MIR* expression.

189 The increased RNAPII and/or DCL1 occupancy on pre-miRNA coding regions  
190 suggests that in *prp40ab*, transcription and processing complexes are stuck on *MIRs*. To  
191 determine whether miRNA precursors also accumulated on *MIRs* in the *prp40ab* mutants  
192 compared to the WT plants, we separated the nucleoplasmic and chromatin fractions of  
193 nuclei (Extended Data Fig. 13a) and tested the pri-miRNA levels with RT-qPCR performed  
194 separately for each fraction. In agreement with our previous data<sup>14</sup>, we found that in the WT,  
195 the pre-miRNAs derived from BTL-type precursors accumulated predominantly in the  
196 nucleoplasm (Extended Data Fig. 13b). Furthermore, we calculated the *prp40ab*/WT fold  
197 change for chromatin and nucleoplasmic fractions and found that LTB-type precursors are  
198 highly associated with chromatin in *prp40ab* (fold change over 3) (Fig. 5d, Extended Data  
199 Fig. 13c), while BTL-type precursors show only minor (fold change below 3) or no change in  
200 the chromatin fraction (Fig. 5d, Extended Data Fig. 13d). In the nucleoplasmic fraction, both



201 types of precursors were mostly decreased. Interestingly, we did not find an increased  
202 chromatin association of full-length poly(A)-tailed precursors (Extended Data Fig. 13e).

203 The obtained results show that AtPRP40 regulates cotranscriptional miRNA  
204 biogenesis by affecting RNAPII and microprocessor activity on *MIRs*. This finding shows that  
205 AtPRP40 is involved in correct cotranscriptional microprocessor assembly.

206

## 207 **Discussion**

208 Coupling of pre-mRNA processing with transcription is a well-established phenomenon <sup>23-</sup>  
209 <sup>25,38-40</sup>. Cotranscriptional processing of miRNA precursors in humans has also been reported  
210 <sup>13,41</sup>. However, some results obtained demonstrate that mammalian pri-miRNA processing  
211 kinetics range from fast over intermediate to slow and that pri-miRNAs might be processed  
212 both co- and post-transcriptionally <sup>42</sup>. Moreover, it has been claimed that chromatin retention  
213 does not determine the processing type, since the authors observed chromatin release of pri-  
214 miRNAs at comparable times after transcription for pri-miRNAs showing different processing  
215 kinetics. However, the factors regulating the kinetics of pri-miRNA processing and the co-  
216 and post-transcriptional mechanism of pri-miRNA processing have not been identified.

217 In human cells, the FUS (fused in sarcoma/translocated in liposarcoma) protein has  
218 been suggested to be a factor involved in the biogenesis of a large class of miRNAs, among  
219 which neuronal miRNAs are known to have a crucial role in neuronal function <sup>43</sup>. It has been  
220 shown that FUS is recruited to chromatin by binding to newly synthesized pri-miRNAs, where  
221 it facilitates Drosha (one of the two RNase III enzymes involved in miRNA biogenesis in  
222 animals) loading, supporting cotranscriptional processing of miRNA precursors <sup>43</sup>. It has also  
223 been suggested that the histone H1-like protein HP1BP3, but not canonical H1 variants,  
224 associates with the human microprocessor and promotes global miRNA biogenesis. HP1BP3  
225 binds both DNA and pri-miRNA and enhances cotranscriptional miRNA  
226 processing *via* chromatin retention of nascent pri-miRNAs. This study clearly suggests the  
227 existence of a class of chromatin retention factors stimulating cotranscriptional miRNA  
228 processing in animal cells <sup>44</sup>. Thus, the results indicate that both specific chromatin marks

229 and additional protein factors connected with miRNA gene transcription may control the  
230 cotranscriptional assembly of the miRNA biogenesis machinery.

231 In contrast to that in animals, plant miRNA biogenesis occurs exclusively in the cell  
232 nucleus. Moreover, special nuclear structures called dicing bodies (D-bodies) are considered  
233 places of plant pri-miRNA processing <sup>45</sup>. The fact that in each plant cell nucleus, only a few  
234 D-bodies are observed may suggest a post-transcriptional mechanism of plant pri-miRNA  
235 processing. Recently, we showed that pri-miRNA processing in plants is a cotranscriptional  
236 process; however, some steps occur post-transcriptionally in the nucleoplasm after release  
237 of the processing intermediates (pre-miRNAs) from the transcription sites. Moreover, we  
238 discovered that the structure of miRNA primary precursors dictates processing localization <sup>14</sup>.  
239 Plant pri-miRNAs were shown to be processed in two different manners: base-to-loop (BTL  
240 processing) and loop-to-base (LTB processing) <sup>8,9</sup>. We demonstrated that for pri-miRNAs  
241 processed in an LTB manner, both processing steps occur cotranscriptionally, and in the  
242 case of BTL-type pri-miRNA processing, the first step is cotranscriptional, but the second  
243 occurs post-transcriptionally in the nucleoplasm. The data presented in this work confirm our  
244 previous conclusions on cotranscriptional miRNA biogenesis in plants <sup>14</sup>. We show here that  
245 BTL-type miRNA precursors accumulate predominantly in the nucleoplasm (Extended Data  
246 Fig. 13b), in contrast to LTB-type transcripts that localize mostly on *MIRs*. In this paper, we  
247 also identified a protein factor that is involved in the regulation of cotranscriptional miRNA  
248 biogenesis in plants. This protein is AtPRP40, the Arabidopsis U1 snRNP auxiliary protein.

249 The direct interaction between AtPRP40 that binds to the CTD of RNAPII and the SE  
250 protein has been described by us previously <sup>18</sup>. This observation prompted us to test whether  
251 SE forms a complex with RNAPII and whether the SE/RNAPII interaction requires the  
252 presence of AtPRP40. Indeed, we prove here that AtPRP40 mediates the association of SE  
253 with RNAPII (Fig. 1b, d, Extended Data Fig. 7) on miRNA genes (Fig. 2). Therefore, we  
254 further explored the role of AtPRP40 in miRNA biogenesis and cotranscriptional  
255 microprocessor assembly. We observed lower levels of polyadenylated miRNA precursors  
256 (Fig. 3a) but increased accumulation of non-polyadenylated precursors on *MIRs* in the

257 *prp40ab* mutant plants (Extended Data Fig. 13). We also found that RNAPII accumulates in  
258 the *prp40ab* mutants on pre-miRNA coding regions, which together indicate retention of  
259 RNAPII on *MIRs* when the AtPRP40a and b proteins are absent (Fig. 4, Extended Data Fig.  
260 12a, c). The recruitment of DCL1 and SE, two key components of the plant microprocessor  
261 complex, to *MIRs* is also affected in *prp40ab*, suggesting a role of AtPRP40 in  
262 cotranscriptional microprocessor assembly (Figs. 2, 5, Extended Data Figs. 9, 12b, c).  
263 Moreover, our results indicate the existence of an interplay between the microprocessor and  
264 RNAPII. The influence of pre-mRNA processing on RNAPII activity was observed previously  
265 in the case of splicing. It has been shown that inactivation of the promoter proximal 5' splice  
266 sites reduces the level of nascent transcription<sup>46</sup>. Recently, it has also been reported that U2  
267 snRNP has a positive effect on RNAPII transcription elongation<sup>47</sup>. The existence of a  
268 transcriptional elongation checkpoint that is associated with cotranscriptional presplicing  
269 formation has been previously reported by the Beggs group<sup>48</sup>. In Arabidopsis, we previously  
270 showed that NTR1, a spliceosome disassembly factor, is responsible for slowing RNAPII and  
271 the formation of splicing checkpoints at alternative splice sites<sup>49</sup>. Thus, similar to the  
272 interplay between the splicing and transcription machinery, we postulate here that correct  
273 microprocessor assembly, regulated by AtPRP40, has a positive effect on RNAPII  
274 transcription. In WT plants, AtPRP40 mediates the recruitment of SE to nascent *MIR*  
275 transcripts and facilitates the proper assembly of the whole microprocessor, processing of  
276 the primary miRNA precursors (Fig. 6) and the smooth movement of RNAPII along pre-  
277 miRNA coding regions. In the case of impaired microprocessor component recruitment, as  
278 we show in the *prp40ab* mutants, RNAPII slows down to allow the miRNA biogenesis  
279 complex to be formed.

280 Interestingly, while RNAPII accumulates on most *MIRs* in *prp40ab*, we observed  
281 increased occupancy of DCL1 only on approximately half of the *MIRs* in this mutant  
282 (Extended Data Fig. 12c). On the rest of the *MIRs*, the accumulation of DCL1 in *prp40ab* was  
283 not changed or decreased. DCL1 accumulation on *MIRs* in the *prp40ab* mutant is most likely  
284 due to the retention of nascent non-polyadenylated transcripts attached to the transcription

285 sites. As already mentioned, both steps of processing of LTB pri-miRNAs are carried out  
286 cotranscriptionally, in contrast to BTL pri-miRNAs, where the second step of miRNA  
287 maturation takes place post-transcriptionally after releasing pre-miRNAs to the nucleoplasm.  
288 This difference in miRNA biogenesis can explain why the accumulation of DCL1 is observed  
289 only on LTB *MIRs*: stem-loop structures are cut out from BTL pri-miRNAs and released to  
290 the nucleoplasm, taking DCL1 away from the transcription sites. However, the higher  
291 association of DCL1 with *MIRs* and the retention of primary miRNA precursors on chromatin  
292 had no major effect on the levels of mature miRNAs (Fig. 3b). This finding indicates that  
293 cotranscriptional pri-miRNA processing is very efficient, and in the case of a disturbance in  
294 microprocessor assembly, the retention of miRNA precursors at transcription sites is  
295 sufficient to obtain the correct levels of mature miRNAs. This finding is in agreement with  
296 data showing that animal pri-miRNAs retained at transcription sites due to the deletion of 3'  
297 end processing signals are processed more efficiently than pri-miRNAs that are cleaved,  
298 polyadenylated and released<sup>50</sup>. One of the possible reasons for this result is the higher  
299 amount of substrates available for processing. We observed a similar effect of mutation of  
300 HEN2, an RNA helicase that is involved in RNA degradation by the nuclear RNA exosome,  
301 on miRNA biogenesis<sup>51</sup>. In *se-2*, pri-miRNAs accumulate, and mature miRNA levels are  
302 downregulated because of poor pri-miRNA processing efficiency in the absence of fully  
303 active SE. However, in the *se-2 hen2-2* double mutant, we observed the increased  
304 accumulation of pri-miRNAs and partially restored levels of mature miRNAs, which led to  
305 attenuation of the developmental defects characteristic of *se-2* mutant plants<sup>51</sup>. This result  
306 indicates that slow degradation of pri-miRNAs due to HEN2 loss can compensate for  
307 inefficient pri-miRNA processing. In WT plants, cotranscriptional microprocessor assembly  
308 on newly synthesized pri-miRNAs stimulated RNAPII to pause the transcription of *MIRs* (Fig.  
309 4a). Impaired cotranscriptional microprocessor assembly leads to longer RNAPII pausing in  
310 the pre-miRNA coding region accompanied by the accumulation of miRNA primary  
311 precursors at their transcription sites. This phenomenon provides additional time for the  
312 processing of accumulated, non-polyadenylated *MIR* transcripts. Therefore, the level of most

313 miRNAs was not changed or was even slightly increased, while the levels of polyadenylated  
314 pri-miRNAs decreased in plants lacking AtPRP40a and b. Thus, our results demonstrate that  
315 AtPRP40 is the protein that contributes to the cotranscriptional recruitment of DCL1 and SE  
316 to pri-miRNAs, which regulate RNAPII activity over *MIRs*. However, we still do not exclude  
317 the possibility of a more direct influence of AtPRP40 on transcription carried out by RNAPII.  
318 Additional studies are needed to distinguish between these possibilities.

319 **Methods**

320 ***Plant material***

321 *A. thaliana* (Col-0 wild-type, *se-1*<sup>52</sup>, *se-2*<sup>53</sup>, *prp40a* (SALK\_021070), *prp40b*  
322 (SALK\_066044), *prp40c* (SALK\_148319), *prp40ab* (SALK\_021070 x SALK\_066044), and  
323 *hyl1-2*<sup>54</sup> seeds after 3 days of stratification were grown at 22 °C (16/8 h light/dark, 50–60%  
324 humidity, 150–200  $\mu\text{mol m}^{-2} \text{ s}^{-1}$  photon flux density) in Jiffy-7 pots (Jiffy) and collected on  
325 Day 21 of growth or used in crosses. The GFP-SE transgenic line was produced in the *se-4*  
326<sup>55</sup> background by incorporation of an additional copy of SE fused with GFP under the control  
327 of the UBQ10 promoter. For ChIP analyses, 14-day-old seedlings grown on ½ MS solid  
328 medium were used instead.

329

330 ***RNA isolation and cDNA preparation***

331 Total RNA for AtPRP40 mRNAs, pri-miRNA and miRNA level analyses was prepared  
332 according to<sup>56</sup>. Briefly, RNA was isolated using a Direct-zol<sup>TM</sup> RNA Mini Prep Kit (Zymo  
333 Research) and treated with Turbo DNase I (Thermo Fisher Scientific).  
334 For transcript expression levels, 3  $\mu\text{g}$  of total DNase-treated RNA was reverse transcribed to  
335 cDNA with the use of SuperScript III Reverse Transcriptase (Thermo Fisher Scientific) and  
336 oligo-dT(18) or random-hexamer primers (Thermo Fisher Scientific).  
337 Nascent transcripts and chromatin-associated RNAs were separated from the nucleoplasm  
338 using the protocol described by<sup>57</sup>. cDNA was prepared with the use of random-hexamer  
339 primers (Thermo Fisher Scientific).

340

341 ***RT-qPCR***

342 RT-qPCR experiments were performed with Power SYBR<sup>®</sup> Green PCR Master Mix  
343 (Thermo Fisher Scientific) using a 7900HT Fast Real-Time PCR System (Thermo Fisher  
344 Scientific) as previously described<sup>18</sup>. The primers from Supplementary Table 1 were used.  
345 Expression levels were calculated using the relative quantification ( $2^{-\Delta\text{Ct}}$ ), while the fold  
346 change was calculated using the  $2^{-\Delta\Delta\text{Ct}}$  method<sup>56</sup>. The mRNA fragments of glyceraldehyde-

347 3-phosphate dehydrogenase (GAPDH, *At1g13440*) were amplified and detected  
348 simultaneously as a reference gene.

349 The *A. thaliana* pri-miRNA expression platform mirEX 2.0 was applied according to <sup>56</sup>.  
350 Each RT-qPCR was performed independently for three biological replicates. All results were  
351 analyzed using SDS 2.4 software (Thermo Fisher Scientific) and Microsoft Excel. Error bars  
352 were calculated using the SD Function in Microsoft Excel software. The statistical  
353 significance of the results presented was estimated using Student's t test at three  
354 significance levels: \*P < 0.05, \*\*P < 0.01 and \*\*\*P < 0.001.

355

### 356 ***Small RNA sequencing***

357 Total RNA was isolated using the Direct-zol™ RNA kit (Zymo Research). RNA was quantified  
358 using a Qubit RNA Assay Kit (Life Technologies), and integrity was confirmed on an Agilent  
359 Bioanalyzer 2100 system. A total of 10 µg of each RNA sample was separated by  
360 electrophoresis on a 15% polyacrylamide 8 M urea gel in 1X TBE buffer. Small RNA fractions  
361 were cut out and purified from the gel. Libraries were prepared using the TruSeq Small RNA  
362 Library Preparation Kit (Illumina). Single-end (1×50 bp) sequencing was performed at  
363 Fasteris, Geneva, Switzerland on a HiSeq 4000 platform. Adapter sequences were removed  
364 from raw reads with FASTX-Toolkit (fastx clipper). The clean reads were mapped to all  
365 mature *A. thaliana* miRNAs found in miRBase (release 22) using countreads\_mirna.pl script  
366 <sup>58,59</sup>. The script was applied to each fastq file for every biological replicate. Statistical analysis  
367 was performed with the DESeq2 R package <sup>60</sup>.

368

### 369 ***MicroRNA processing precision calculation***

370 The clean reads from small RNA sequencing were mapped to the *A. thaliana* TAIR10  
371 genome using Rsubread <sup>61</sup>. The FeatureCount function from the RSubread package was  
372 used to obtain the number of reads of precisely processed miRNA (fracOverlapFeature = 1  
373 and fracOverlap = 1 parameters) and imprecisely processed miRNA (fracOverlapFeature = 0  
374 and fracOverlap = 0 parameters). In both cases, only uniquely mapped reads were counted



375 (countMultiMappingReads = FALSE parameter). An annotation file from miRBase (release  
376 22) was used for the mature microRNA coordinates. The processing precision value  
377 represents the ratio between precisely and imprecisely processed miRNAs.

378

### 379 **ChIP**

380 Chromatin immunoprecipitation was performed as described<sup>62</sup> with IP buffer prepared as  
381 described<sup>63</sup>. Chromatin was sonicated at 4 °C with a Diagenode Bioruptor Pico for ~15 min  
382 (30 s on/30 s off) to obtain 250-500 bp DNA fragments. Antibodies against total RNAPII  
383 (Abcam ab817, 5 µg/IP), DCL1 (Agrisera AS19 4307, 10 µg/IP), and SE (Agrisera AS09  
384 532A - 10µg/IP) were used with Dynabeads Protein G (Thermo Fisher Scientific). For  
385 decrosslinking and DNA isolation, samples were treated with Proteinase K (Thermo Fisher  
386 Scientific) for 6 h at 55 °C followed by purification with a Qiaquick PCR Kit (Qiagen). Libraries  
387 were prepared using a MicroPlex Library Preparation Kit (Diagenode) and sequenced on the  
388 NextSeq platform.

389

### 390 **Pull-down assay**

391 The *Escherichia coli* strain BL21-CodonPlus(De3)-RIL was transformed with pMal-derived  
392 plasmids encoding SE (full length or Δ681-720 aa) or AtPRP40b fused with maltose-binding  
393 protein and 6xHis (MBP-6xHis-SE/AtPRP40b). Overexpression was performed as follows:  
394 cells were grown for 16 h at 20 °C after induction by 0.4 mM isopropyl β-D-1-  
395 thiogalactopyranoside (IPTG) and then harvested and sonicated (6 cycles of 45 s ON and 60  
396 s OFF on ice) in lysis buffer (50 mM Tris–HCl pH 7.5, 300 mM NaCl, 10 mM imidazole, 5 mM  
397 β-mercaptoethanol, 0.5% Triton X-100, Roche Complete Mini EDTA-free protease inhibitor  
398 tablets (Sigma-Aldrich)). After sonication, lysates were centrifuged for 45 min at 8 000 × g at  
399 4 °C, and the supernatants containing the protein extract were collected. Proteins were  
400 purified with HisPur™ Ni-NTA Resin (Thermo Fisher Scientific), and MBP was cleaved off by  
401 TEV protease during overnight incubation in dialysis buffer (50 mM Tris–HCl pH=7.5, 300  
402 mM NaCl, 10 mM imidazole, 5 mM β-mercaptoethanol) at 4 °C. The TEV protease and MBP



403 were removed in the additional purification step with the use of HisPur™ Ni-NTA Resin  
404 (Thermo Fisher Scientific). Next, SE variants and AtPRP40b were purified by size exclusion  
405 chromatography.

406 The biotinylated CTD peptides were synthesized by Thermo Fisher Scientific. For the  
407 pull-down experiment, Streptavidin MagneSphere® Paramagnetic Particles (Promega) were  
408 washed three times with Buffer A (PBS pH 8.3, 5% glycerol, 1 mM DTT, 0.03% NP-40,  
409 Pierce™ Phosphatase Inhibitor Mini Tablets (Thermo Fisher Scientific)) and incubated with 2  
410 µg of un-, Ser5-, or Ser2-phosphorylated CTD peptide for 2 h at 4 °C in buffer A. Next,  
411 streptavidin particles with immobilized peptides were washed three times with buffer B (PBS  
412 pH 8.3, 5% glycerol, 1 mM DTT, 0.1% NP-40, Pierce™ Phosphatase Inhibitor Mini Tablets  
413 (Thermo Fisher Scientific), Roche Complete Mini EDTA-free protease inhibitor tablets  
414 (Sigma-Aldrich) and incubated with 2 µg of SE variant, AtPRP40b or both for 1.5 h at 4 °C.  
415 Streptavidin particles were then washed five times with buffer B, and immobilized proteins  
416 were eluted with 3x Laemmli sample buffer (150 mM Tris-HCl pH 6.8, 150 mM DTT, 2% β-  
417 mercaptoethanol, 6% SDS, 0.03% bromophenol blue, 30% glycerol) at 25 °C on a  
418 thermomixer (350 rpm). Protein samples were separated in a 10% sodium dodecyl sulfate-  
419 polyacrylamide gel, transferred to PVDF membranes and detected by Western blots. The  
420 following antibodies were used: anti-PRP40b (AS14 2785, Agrisera; 1: 10,000), anti-His (sc-  
421 8036, Santa Cruz Biotechnology; 1: 1000), anti-rabbit (AS09 602, Agrisera; 1: 20,000), and  
422 anti-mouse (sc-2005, Santa Cruz Biotechnology, 1: 10,000). Input represents 1/10 of the  
423 protein sample.

424

#### 425 **Western blot**

426 Thirty micrograms of *A. thaliana* whole leaf extract (extraction buffer: 100 mM Tris, 10%  
427 glycerol, 5 mM EDTA, 5 mM EGTA, 0.15 M NaCl, 0.75% Triton X-100, 0.05% SDS, and 1  
428 mM DTT) was resolved in a 10% denaturing gel, transferred to PVDF membranes and  
429 detected by Western blotting. The following antibodies were used: anti-AtPRP40b (AS14  
430 2785, Agrisera; 1: 10,000), anti-DCL1 (AS19 4307; Agrisera; 1:100), anti-CBP80 (AS09 531;

431 Agrisera: 1: 2000), anti-SE (AS09 532A; Agrisera; 1:2000), anti-HYL1 (AS06 136; Agrisera:  
432 1:1000), anti-actin (691001, MP Biomedicals; 1: 1000), anti-rabbit (AS09 602, Agrisera; 1:  
433 20,000), and anti-mouse (sc-2005, Santa Cruz Biotechnology, 1: 10,000).

434

### 435 ***Immunolabeling and FISH***

436 The experiment was performed on isolated nuclei of 35-day-old *A. thaliana* leaves. The  
437 leaves were fixed in 4% paraformaldehyde in phosphate-buffered saline (PBS, pH 7.2) for 20  
438 min and washed in 10 mM Tris-HCl (pH 7.5). Nuclei isolation was performed according to the  
439 method described in <sup>64</sup>. The nuclei were permeabilized with PBS+0.1% Triton X-100 for 10  
440 min. The following primary antibodies were used: anti-SE (AS09 532A; Agrisera, 1:100) anti-  
441 PRP40b (AS14 2785; Agrisera; 1:100), anti-RNAPII-CTD-Ser5 (3E8; Chromotek; 1:100),  
442 anti-RNAPII-CTD-Ser2 (3E10; Chromotek; 1:100) and applied according to <sup>65</sup>. For the  
443 localization of GFP-SE we used mouse antibodies targeting GFP (ab1218; Abcam; 1:100).  
444 Primary antibody incubation (in 0.01% acetylated BSA in PBS) was performed in a  
445 humidified chamber overnight at 11 °C. After PBS washes, the slides were incubated with the  
446 following secondary antibodies: anti-rabbit Alexa Fluor plus 555 (A32732; Thermo Fisher  
447 Scientific; 1:200) and anti-rat Alexa Fluor 488 (A-11006; Thermo Fisher Scientific; 1:200) or  
448 anti-mouse Alexa Fluor Plus 488, (A32723; Thermo Fisher Scientific; 1:200). The secondary  
449 antibodies were diluted in PBS+0.01% acetylated BSA and incubated at 37 °C in a  
450 humidified chamber for 1 h.

451 In double-labeling FISH-immunofluorescence reactions (U1 snRNA + AtPRP40b  
452 protein), the in situ hybridization method always preceded the immunocytochemical method.  
453 Prior to FISH, the nuclei were permeabilized with PBS+0.1% Triton X-100. The probe  
454 targeting U1 snRNA was labeled at the 5' end with digoxigenin and was resuspended in  
455 hybridization buffer (30%, v/v, formamide, 4× SSC, 5× Denhardt's buffer (0.1% Ficoll 400,  
456 0.1% polyvinylpyrrolidone, 0.1% bovine serum albumin), 1 mM EDTA, and 50 mM phosphate  
457 buffer) at a concentration of 50 pmol/ml. Hybridization was performed overnight at 28 °C.  
458 Digoxigenin (DIG) probes were detected after hybridization using mouse anti-DIG

459 (11333062910; Merck) and anti-mouse Alexa Fluor 488 (A-11001; Thermo Fisher Scientific,  
460 1:200) antibodies in 0.01% acetylated BSA in PBS.

461 The slides were stained for DNA detection with Hoechst 33342 (Life Technology) and  
462 mounted in ProLong Gold antifade reagent (Life Technologies, P36934).

463 Correlation analysis was performed with Pearson's correlation coefficient,  
464 Spearman's rank correlation and the ICQ value. We also used Colocalization Colormap  
465 according to <sup>66</sup>. The statistical analysis was performed using Fiji plugins: coloc2 and  
466 Colocalization Colormap <sup>66,67</sup>. The obtained results were analyzed by Student's t test, \*P  
467 <0.001.

468

#### 469 ***Proximity ligation assay (PLA)***

470 PLA detection was performed using a Duolink In Situ Orange Kit (Merck) according to the  
471 manufacturer's protocol. Prior to the method, the nuclei were treated with PBS buffer  
472 containing 0.1% Triton X-100 and then incubated with Duolink blocking solution at 37 °C in a  
473 humidified chamber for 60 min. After washing, a 2-stage protocol was applied with the  
474 following antibodies: primary rabbit antibodies recognizing SE (AS09 532A, Agrisera, 1: 100)  
475 and AtPRP40b (AS14 2785, Agrisera, 1:100), rat antibodies for the detection of  
476 phosphorylated RNAPII (serine 5 and serine 2) (Chromotek, 1: 100) and secondary goat anti-  
477 rat Alexa Fluor 488 antibodies (A-11006, Thermo Fisher Scientific, 1: 200). The antibodies  
478 were diluted in PBS buffer containing 0.05% acetylated BSA, and the incubation was  
479 performed overnight at 10 °C (primary antibodies) or at 37 °C for 2 h. After incubation, the  
480 nuclei were washed with wash buffer A and subjected to incubation with the Duolink anti-  
481 rabbit PLA-plus probe and the Duolink anti-goat PLA-minus probe in Duolink antibody diluent  
482 (diluted 1:40) at 37 °C for 1 h. Next, after washing, the slides were incubated with the ligation  
483 mix containing ligase at 37 °C for 30 min. Furthermore, amplification buffer containing  
484 polymerase was applied. The amplification reaction was performed for 100 min at 37 °C. This  
485 type of 2-stage protocol allowed to locate both the total pool of RNAPII (green

486 fluorescence) as well as those that are associated with SE or AtPRP40b (red spots of  
487 fluorescence). The slides were stained for DNA detection with Hoechst 33342 (Life  
488 Technology) and mounted in ProLong Gold antifade reagent (Life Technologies, P36934).

489

#### 490 ***Microscopy***

491 The obtained results were registered with a Leica SP8 confocal microscope using a diode  
492 405 laser, an argon/ion laser with a wavelength of 488 nm and a diode laser DPSS 561 that  
493 emitted light with a wavelength of 561 nm. For an optimized pinhole, a long exposure time  
494 (200 kHz) and 63X (numerical aperture, 1.4) Plan Apochromat DIC H oil immersion lens  
495 were used. Images were collected sequentially in blue (Hoechst 33342), green (Alexa 488  
496 fluorescence) and red (Alexa 555, PLA Orange) channels. For bleed-through analysis and  
497 control experiments, Leica SP8 software was used.

498

#### 499 **Data availability**

500 The data reported in this paper have been deposited in the NCBI GEO database,  
501 <https://www.ncbi.nlm.nih.gov/geo> (accession no. GSE187461).

502

## 503 References

- 504 1. Borges, F. & Martienssen, R. A. The expanding world of small RNAs in plants. *Nature*  
505 *Reviews Molecular Cell Biology* vol. 16 727–741 (2015).
- 506 2. Kruszka, K. *et al.* Role of microRNAs and other sRNAs of plants in their changing  
507 environments. *Journal of Plant Physiology* **169**, 1664–1672 (2012).
- 508 3. Barciszewska-Pacak, M. *et al.* Arabidopsis microRNA expression regulation in a wide  
509 range of abiotic stress responses. *Frontiers in Plant Science* **6**, 1–14 (2015).
- 510 4. Yu, Y., Jia, T. & Chen, X. The ‘how’ and ‘where’ of plant microRNAs. *New Phytologist*  
511 vol. 216 1002–1017 (2017).
- 512 5. Dolata, J. *et al.* Regulation of plant microprocessor function in shaping microRNA  
513 landscape. *Frontiers in Plant Science* vol. 9 (2018).
- 514 6. Stepien, A. *et al.* Posttranscriptional coordination of splicing and miRNA biogenesis in  
515 plants. *Wiley Interdisciplinary Reviews: RNA* vol. 8 (2017).
- 516 7. Kurihara, Y. & Watanabe, Y. Arabidopsis micro-RNA biogenesis through Dicer-like 1  
517 protein functions. *Proceedings of the National Academy of Sciences of the United*  
518 *States of America* **101**, 12753–8 (2004).
- 519 8. Zhu, H. *et al.* Bidirectional processing of pri-miRNAs with branched terminal loops by  
520 Arabidopsis Dicer-like1. *Nature Structural and Molecular Biology* **20**, 1106–1115  
521 (2013).
- 522 9. Moro, B. *et al.* Efficiency and precision of microRNA biogenesis modes in plants.  
523 *Nucleic Acids Research* **46**, 10709–10723 (2018).
- 524 10. Dong, Z., Han, M. H. & Fedoroff, N. The RNA-binding proteins HYL1 and SE promote  
525 accurate in vitro processing of pri-miRNA by DCL1. *Proceedings of the National*  
526 *Academy of Sciences of the United States of America* **105**, 9970–9975 (2008).
- 527 11. Laubinger, S. *et al.* Dual roles of the nuclear cap-binding complex and SERRATE in  
528 pre-mRNA splicing and microRNA processing in Arabidopsis thaliana. *Proceedings of*  
529 *the National Academy of Sciences of the United States of America* **105**, 8795–8800  
530 (2008).
- 531 12. Szarynska, B. *et al.* Gene structures and processing of Arabidopsis thaliana HYL1-  
532 dependent pri-miRNAs. *Nucleic Acids Research* **37**, 3083–3093 (2009).
- 533 13. Morlando, M. *et al.* Primary microRNA transcripts are processed co-transcriptionally.  
534 *Nature Structural and Molecular Biology* **15**, 902–909 (2008).
- 535 14. Gonzalo, L. *et al.* R-Loops between nascent pri-miRNAs and the encoding loci  
536 promote co-transcriptional processing of miRNAs in plants.  
537 doi:10.1101/2021.09.07.459282.
- 538 15. Cambiagno, D. A. *et al.* HASTY modulates miRNA biogenesis by linking pri-miRNA  
539 transcription and processing. *Molecular Plant* **14**, 426–439 (2021).
- 540 16. Fang, X., Cui, Y., Li, Y. & Qi, Y. Transcription and processing of primary microRNAs  
541 are coupled by Elongator complex in Arabidopsis. *Nature Plants* **1**, 1–9 (2015).
- 542 17. Speth, C. *et al.* Arabidopsis RNA processing factor SERRATE regulates the  
543 transcription of intronless genes. *eLife* **7**, 1–21 (2018).

- 544 18. Knop, K. *et al.* Active 5' splice sites regulate the biogenesis efficiency of Arabidopsis  
545 microRNAs derived from intron-containing genes. *Nucleic Acids Research* **45**, 2757–  
546 2775 (2017).
- 547 19. Kotovic, K. M., Lockshon, D., Boric, L. & Neugebauer, K. M. Cotranscriptional  
548 Recruitment of the U1 snRNP to Intron-Containing Genes in Yeast. *Molecular and*  
549 *Cellular Biology* **23**, 5768–5779 (2003).
- 550 20. Lacadie, S. A. & Rosbash, M. Cotranscriptional spliceosome assembly dynamics and  
551 the role of U1 snRNA:5'ss base pairing in yeast. *Molecular Cell* **19**, 65–75 (2005).
- 552 21. Tardiff, D. F. & Rosbash, M. Arrested yeast splicing complexes indicate stepwise  
553 snRNP recruitment during in vivo spliceosome assembly. *Rna* **12**, 968–979 (2006).
- 554 22. Görnemann, J., Kotovic, K. M., Hujer, K. & Neugebauer, K. M. Cotranscriptional  
555 spliceosome assembly occurs in a stepwise fashion and requires the cap binding  
556 complex. *Molecular Cell* **19**, 53–63 (2005).
- 557 23. Greenleaf, A. L. Positive patches and negative noodles: linking RNA processing to  
558 transcription? *Trends in Biochemical Sciences* **18**, 117–119 (1993).
- 559 24. Susan McCracken, Nova Fong, K. Y., Scott Ballantyne, Guohua Pant, J. G. & Scott D.  
560 Patterson+, M. W. & D. L. B. The C-terminal domain of RNAPII couples mRNA  
561 processing to transcription. *Nature* **10**, 807–809 (1997).
- 562 25. Braunschweig, U., Gueroussov, S., Plocik, A. M., Graveley, B. R. & Blencowe, B. J.  
563 Dynamic integration of splicing within gene regulatory pathways. *Cell* **152**, 1252–1269  
564 (2013).
- 565 26. Morris, D. P. & Greenleaf, A. L. The splicing factor, Prp40, binds the phosphorylated  
566 carboxyl-terminal domain of RNA Polymerase II. *Journal of Biological Chemistry* **275**,  
567 39935–39943 (2000).
- 568 27. Kang, C. H. *et al.* Arabidopsis thaliana PRP40s are RNA polymerase II C-terminal  
569 domain-associating proteins. *Archives of Biochemistry and Biophysics* **484**, 30–38  
570 (2009).
- 571 28. Suñé, C. *et al.* CA150, a nuclear protein associated with the RNA polymerase II  
572 holoenzyme, is involved in Tat-activated human immunodeficiency virus type 1  
573 transcription. *Molecular and Cellular Biology* **17**, 6029–6039 (1997).
- 574 29. Carty, S. M., Goldstrohm, A. C., Suñé, C., Garcia-Blanco, M. A. & Greenleaf, A. L.  
575 Protein-interaction modules that organize nuclear function: FF domains of CA150 bind  
576 the phosphoCTD of RNA polymerase II. *Proceedings of the National Academy of*  
577 *Sciences of the United States of America* **97**, 9015–9020 (2000).
- 578 30. Kao, H. Y. & Siliciano, P. G. Identification of Prp40, a novel essential yeast splicing  
579 factor associated with the U1 small nuclear ribonucleoprotein particle. *Molecular and*  
580 *Cellular Biology* **16**, 960–967 (1996).
- 581 31. Görnemann, J. *et al.* Cotranscriptional spliceosome assembly and splicing are  
582 independent of the Prp40p WW domain. *Rna* **17**, 2119–2129 (2011).
- 583 32. Ester, C. & Uetz, P. The FF domains of yeast U1 snRNP protein Prp40 mediate  
584 interactions with Luc7 and Snu71. *BMC Biochemistry* **9**, 1–11 (2008).



- 585 33. Becerra, S., Montes, M., Hernández-Munain, C. & Suñe, C. Prp40 pre-mRNA  
586 processing factor 40 homolog B (PRPF40B) associates with SF1 and U2AF65 and  
587 modulates alternative pre-mRNA splicing in vivo. *Rna* **21**, 438–457 (2015).
- 588 34. Choudhary, B., Marx, O. & Norris, A. D. Spliceosomal component PRP-40 is a central  
589 regulator of microexon splicing. *Cell Reports* **36**, (2021).
- 590 35. Wang, B.-B. & Brendel, V. ASRG database identification and survey of Arabidopsis  
591 thaliana genes involved in pre-mRNA splicing. *Wang and Brendel* **5**, (2004).
- 592 36. Bielewicz, D. *et al.* mirEX: A platform for comparative exploration of plant pri-miRNA  
593 expression data. *Nucleic Acids Research* **40**, 191–197 (2012).
- 594 37. Zielezinski, A. *et al.* mirEX 2.0 - an integrated environment for expression profiling of  
595 plant microRNAs. *BMC Plant Biology* **15**, 1–9 (2015).
- 596 38. Fabrega, C., Shen, V., Shuman, S. & Lima, C. D. Structure of an mRNA capping  
597 enzyme bound to the phosphorylated carboxy-terminal domain of RNA polymerase II.  
598 *Molecular Cell* **11**, 1549–1561 (2003).
- 599 39. Nojima, T. *et al.* Mammalian NET-seq reveals genome-wide nascent transcription  
600 coupled to RNA processing. *Cell* **161**, 526–540 (2015).
- 601 40. Nojima, T. *et al.* RNA Polymerase II Phosphorylated on CTD Serine 5 Interacts with  
602 the Spliceosome during Co-transcriptional Splicing. *Molecular Cell* **72**, 369-379.e4  
603 (2018).
- 604 41. Yin, S., Yu, Y. & Reed, R. Primary microRNA processing is functionally coupled to  
605 RNAP II transcription in vitro. *Scientific Reports* **5**, 1–10 (2015).
- 606 42. Louloui, A., Ntini, E., Liz, J. & Ørom, U. A. Microprocessor dynamics shows co-and  
607 post-transcriptional processing of pri-miRNAs. (2017) doi:10.1261/rna.
- 608 43. Morlando, M. *et al.* FUS stimulates microRNA biogenesis by facilitating co-  
609 transcriptional Drosha recruitment. *EMBO Journal* **31**, 4502–4510 (2012).
- 610 44. Liu, H. *et al.* HP1BP3, a Chromatin Retention Factor for Co-transcriptional MicroRNA  
611 Processing. *Molecular Cell* **63**, 420–432 (2016).
- 612 45. Fang, Y. & Spector, D. L. Identification of Nuclear Dicing Bodies Containing Proteins  
613 for MicroRNA Biogenesis in Living Arabidopsis Plants. *Current Biology* **17**, 818–823  
614 (2007).
- 615 46. Furger, A., O'Sullivan, J. M., Binnie, A., Lee, B. A. & Proudfoot, N. J. Promoter  
616 proximal splice sites enhance transcription. *Genes and Development* **16**, 2792–2799  
617 (2002).
- 618 47. Caizzi, L. *et al.* Efficient RNA polymerase II pause release requires U2 snRNP  
619 function. *Molecular Cell* **81**, 1920-1934.e9 (2021).
- 620 48. Chathoth, K. T., Barrass, J. D., Webb, S. & Beggs, J. D. A Splicing-Dependent  
621 Transcriptional Checkpoint Associated with Prespliceosome Formation. *Molecular Cell*  
622 **53**, 779–790 (2014).
- 623 49. Dolata, J. *et al.* NTR 1 is required for transcription elongation checkpoints at  
624 alternative exons in Arabidopsis. *The EMBO Journal* **34**, 544–558 (2015).

- 625 50. Pawlicki, J. M. & Steitz, J. A. Primary microRNA transcript retention at sites of  
626 transcription leads to enhanced microRNA production. *Journal of Cell Biology* **182**,  
627 61–76 (2008).
- 628 51. Bajczyk, M. *et al.* SERRATE interacts with the nuclear exosome targeting (NEXT)  
629 complex to degrade primary miRNA precursors in Arabidopsis. *Nucleic Acids*  
630 *Research* **48**, 6839–6854 (2020).
- 631 52. Prigge, M. J. & Ry Wagner, D. The Arabidopsis SERRATE gene encodes a zinc-finger  
632 protein required for normal shoot development. *Plant Cell* **13**, 1263–1279 (2001).
- 633 53. Grigg, S. P., Canales, C., Hay, A. & Tsiantis, M. SERRATE coordinates shoot  
634 meristem function and leaf axial patterning in Arabidopsis. *Nature* **437**, 1022–1026  
635 (2005).
- 636 54. Vazquez, F., Gascioli, V., Cr  t  , P. & Vaucheret, H. The Nuclear dsRNA Binding  
637 Protein HYL1 Is Required for MicroRNA Accumulation and Plant Development, but  
638 Not Posttranscriptional Transgene Silencing. *Current Biology* **14**, 346–351 (2004).
- 639 55. Lobbes, D., Rallapalli, G., Schmidt, D. D., Martin, C. & Clarke, J. SERRATE: A new  
640 player on the plant microRNA scene. *EMBO Reports* **7**, 1052–1058 (2006).
- 641 56. Dolata, J. *et al.* Quantitative analysis of plant miRNA primary transcripts. in *Methods in*  
642 *Molecular Biology* vol. 2170 53–77 (Humana Press Inc., 2021).
- 643 57. Conrad, T. & Ørom, U. A. Cellular fractionation and isolation of chromatin- associated  
644 RNA. *Methods in Molecular Biology* **1468**, 1–9 (2017).
- 645 58. Kozomara, A. & Griffiths-Jones, S. MiRBase: Annotating high confidence microRNAs  
646 using deep sequencing data. *Nucleic Acids Research* **42**, (2014).
- 647 59. Eminaga, S., Christodoulou, D. C., Vigneault, F., Church, G. M. & Seidman, J. G.  
648 Quantification of microRNA expression with next-generation sequencing. *Current*  
649 *Protocols in Molecular Biology* (2013) doi:10.1002/0471142727.mb0417s103.
- 650 60. Love, M. I., Huber, W. & Anders, S. Moderated estimation of fold change and  
651 dispersion for RNA-seq data with DESeq2. *Genome Biology* **15**, (2014).
- 652 61. Liao, Y., Smyth, G. K. & Shi, W. The R package Rsubread is easier, faster, cheaper  
653 and better for alignment and quantification of RNA sequencing reads. *Nucleic Acids*  
654 *Research* **47**, (2019).
- 655 62. Bowler, C. *et al.* Chromatin techniques for plant cells. *Plant Journal* **39**, 776–789  
656 (2004).
- 657 63. Kaufmann, D., Kraay, A., The, M. M. & Bank, W. *The Worldwide Governance*  
658 *Indicators Methodology and Analytical Issues*. [www.govindicators.org](http://www.govindicators.org) (2010).
- 659 64. Pontvianne, F. *et al.* Identification of Nucleolus-Associated Chromatin Domains  
660 Reveals a Role for the Nucleolus in 3D Organization of the *A. thaliana*  
661 Genome. Pontvianne, F., Carpentier, M.-C., Durut, N., Pavlišťová, V., Jaške, K.,  
662 Schořová, Š., Parrinello, H., Rohmer, M., Pikaas. *Cell reports* **16**, 1574–1587 (2016).
- 663 65. Bhat, S. S. *et al.* mRNA adenosine methylase (MTA) deposits m6A on pri-miRNAs to  
664 modulate miRNA biogenesis in Arabidopsis thaliana. *Proceedings of the National*  
665 *Academy of Sciences of the United States of America* **117**, 21785–21795 (2020).



- 666 66. Jaskolski, F., Mulle, C. & Manzoni, O. J. An automated method to quantify and  
667 visualize colocalized fluorescent signals. *Journal of Neuroscience Methods* **146**, 42–  
668 49 (2005).
- 669 67. Dobbyn, A. *et al.* Landscape of Conditional eQTL in Dorsolateral Prefrontal Cortex and  
670 Co-localization with Schizophrenia GWAS. *American Journal of Human Genetics* **102**,  
671 1169–1184 (2018).
- 672 68. Boyes, D. C. *et al.* *Growth Stage-Based Phenotypic Analysis of Arabidopsis: A Model*  
673 *for High Throughput Functional Genomics in Plants. The Plant Cell* vol. 13  
674 [www.plantcell.org](http://www.plantcell.org) (2001).

675

676

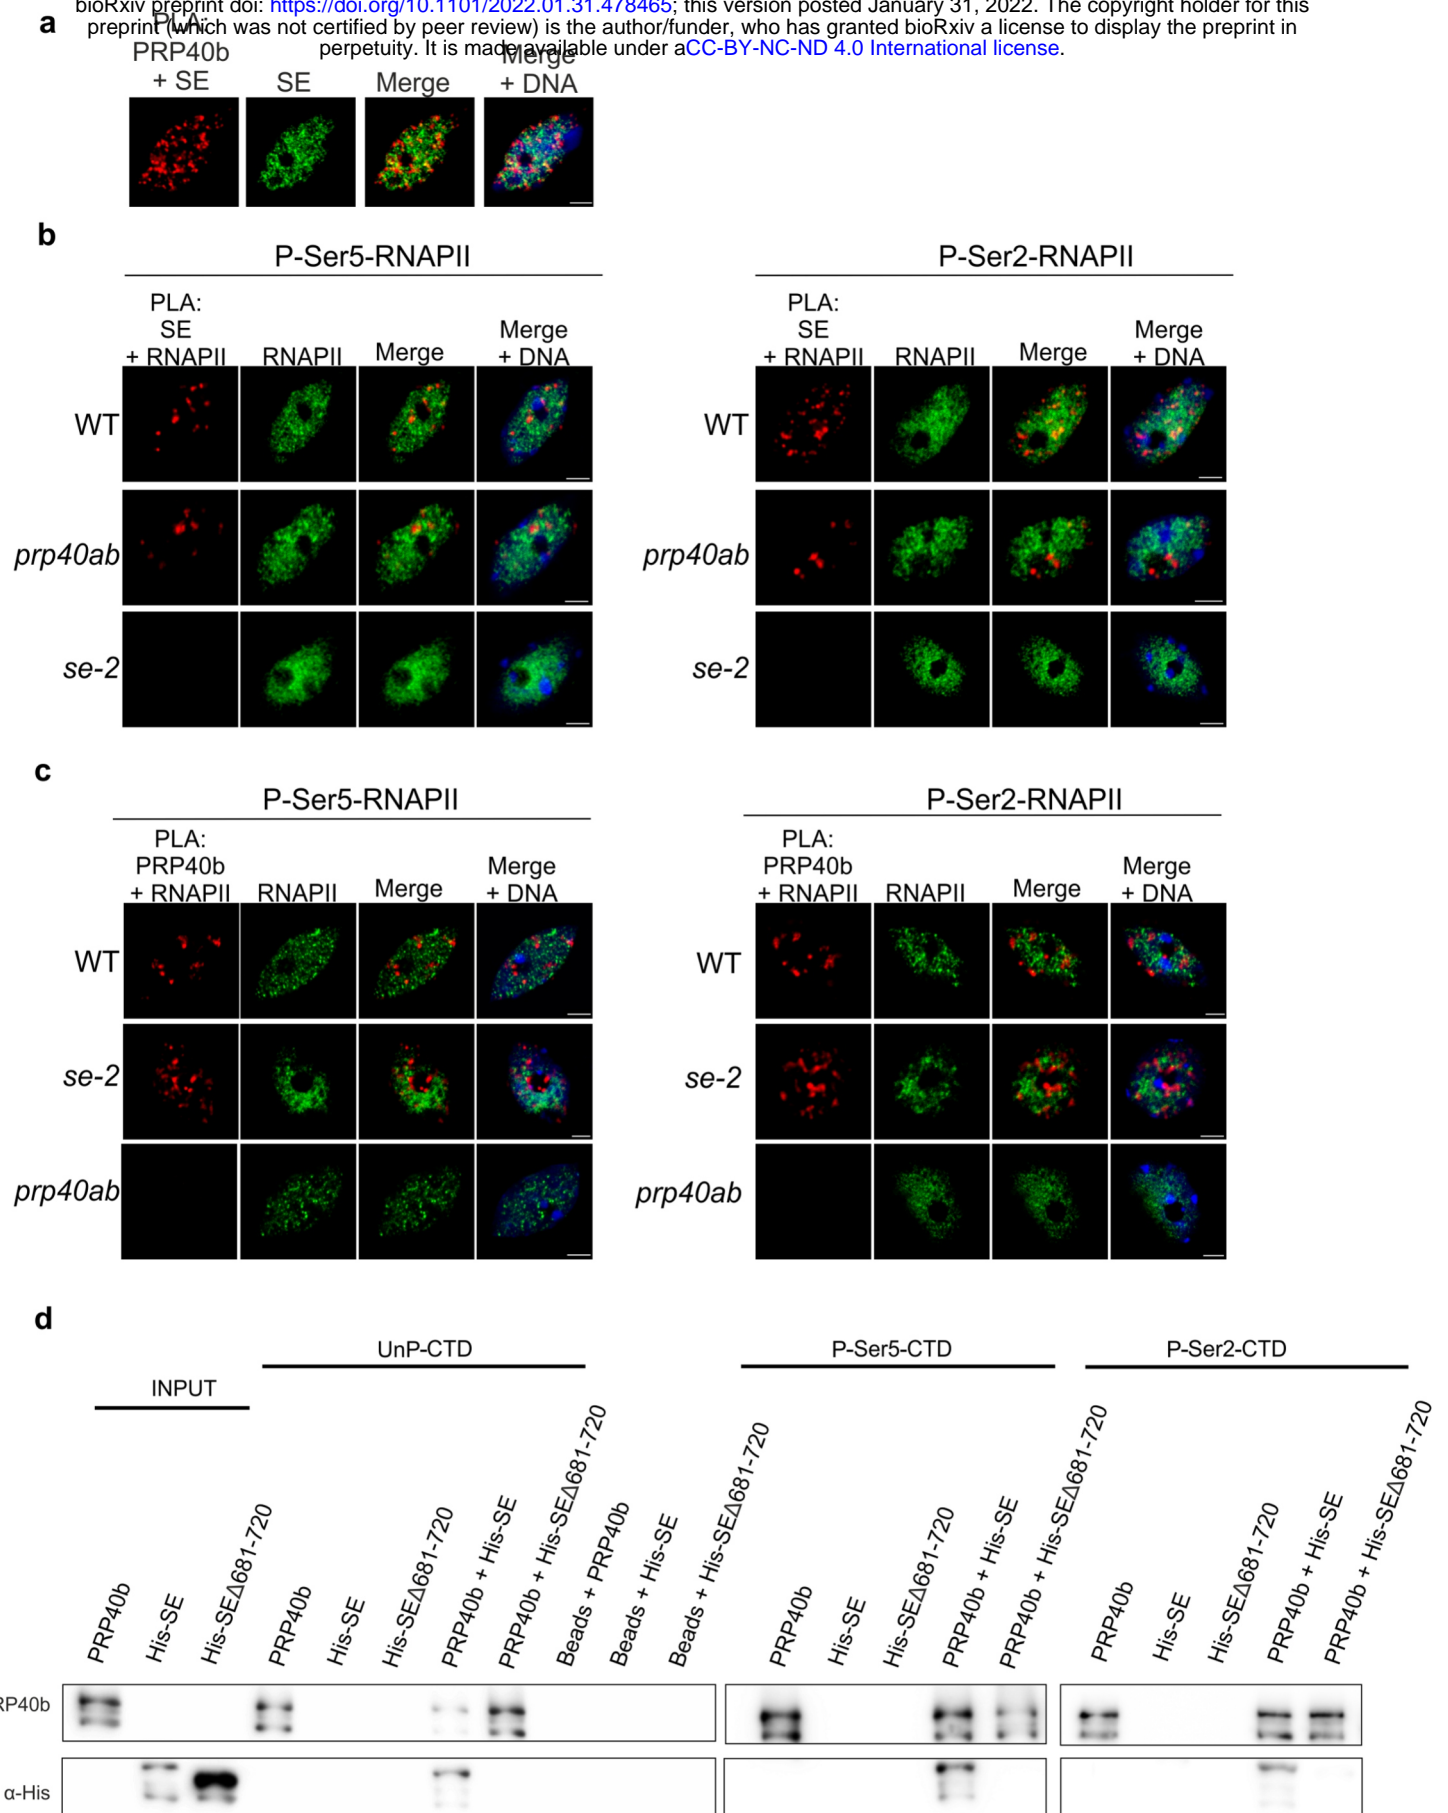

### Fig 1 AtPRP40 regulates the association of SE with RNAPII

**a**, Close proximity of AtPRP40b and SE in the cell nucleus (first image, red signals) analyzed by PLA in view of SE nuclear localization (second image, green signals). DNA was stained with Hoechst (blue). Scale bar = 5 μm. **b**, Close proximity of SE and RNAPII phosphorylated at CTD Ser5 or Ser2 in the WT, *prp40ab* and *se-2* plants (first columns, red signals) in view of P-Ser5-RNAPII or P-Ser2-RNAPII nuclear localization (second columns, green signals) detected by PLA. DNA was stained with Hoechst (blue). Scale bar = 5 μm. **c**, Close proximity of AtPRP40b and RNAPII phosphorylated at CTD Ser5 or Ser2 in the WT, *se-2* and *prp40ab* plants (first columns, red signals) in view of P-Ser5-RNAPII or P-Ser2-RNAPII nuclear localization (second columns, green signals) detected by PLA. DNA was stained with Hoechst (blue). Scale bar = 5 μm. **d**, *In vitro* pull-down assays using recombinant AtPRP40b and SE proteins (both full length and the shortened C-terminus variant Δ681-720 were used) and CTD peptides in unphosphorylated (UnP) or phosphorylated Ser5 (P-Ser5-CTD) or Ser2 (P-Ser2-CTD) forms. Input represents 1/10 of the protein sample.

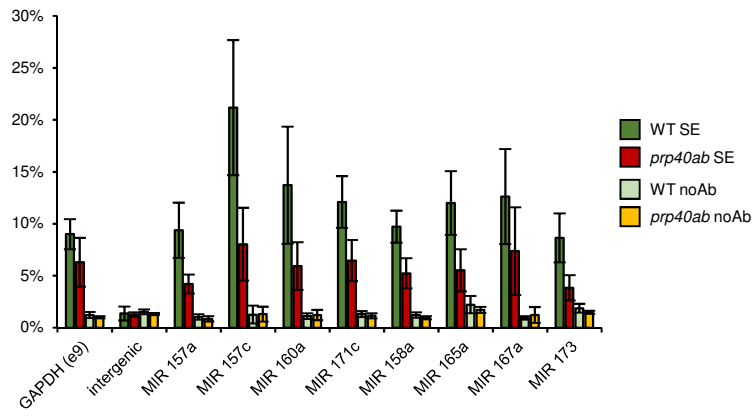

**Fig. 2 AtPRP40 is required for the proper accumulation of SE on miRNA genes**

Quantitative ChIP-PCR analyses of SE accumulation on randomly selected miRNA genes in the *prp40ab* mutant (n=3).

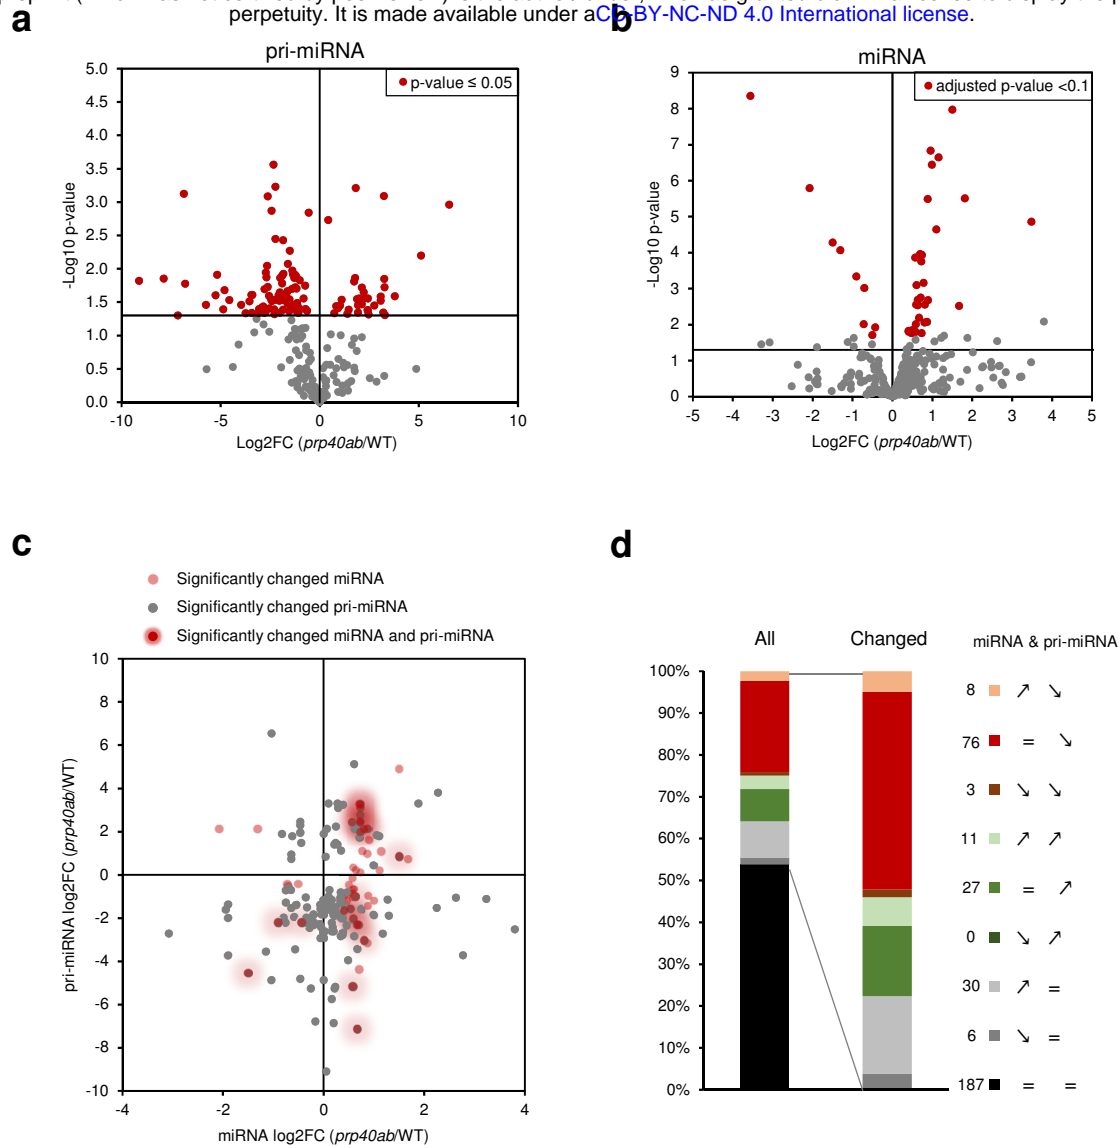

### Fig. 3 AtPRP40 affects the early steps of miRNA biogenesis

**a**, Volcano plot showing changes in the levels of polyadenylated *MIR* transcripts in *prp40ab* (RT-qPCR, n=3). **b**, Volcano plot showing changes in the levels of miRNAs in *prp40ab* (small RNA sequencing, n=3). **c**, Scatter plot showing the levels of polyadenylated *MIR* transcripts relative to corresponding miRNAs. **d**, Expression patterns in *prp40ab* for polyadenylated *MIR* transcripts paired with the corresponding miRNAs. Numbers on the legend corresponds to miRNA & pri-miRNA pairs from each group. Signs on the legend indicates for expression pattern in *prp40ab* for miRNA and pri-miRNA respectively (↗ increased level, ↘ decreased level, = not changed).

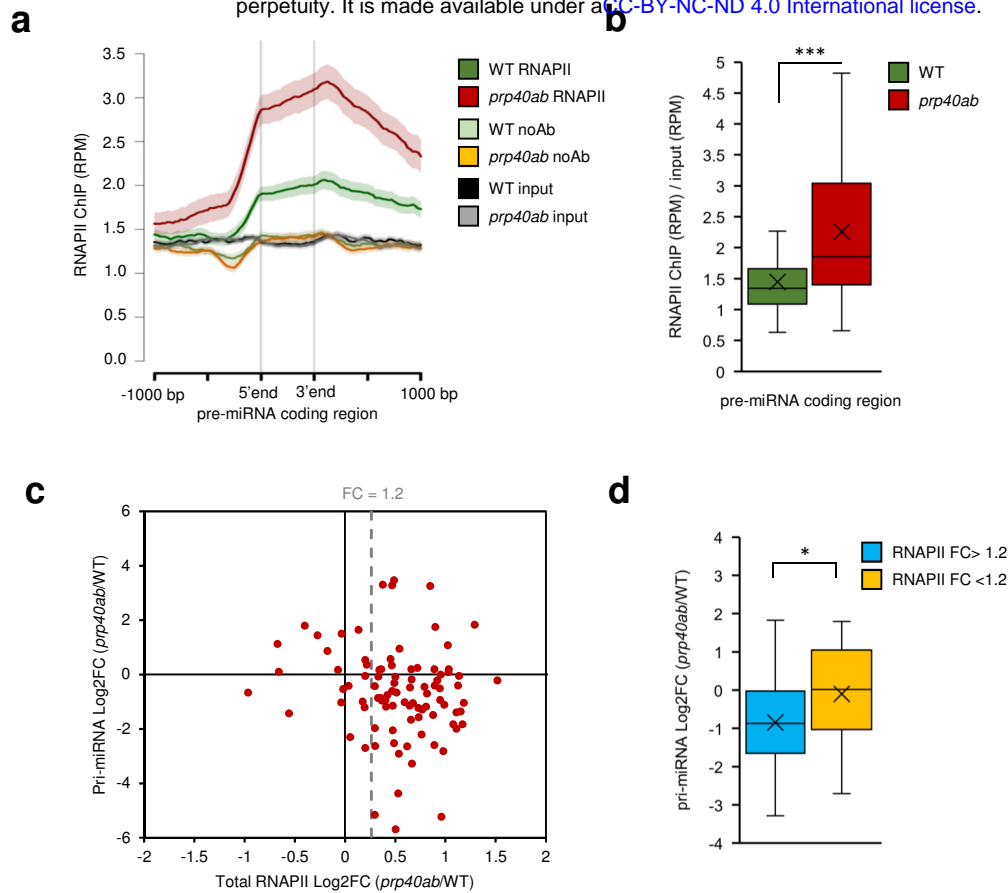

**Fig. 4 RNAPII distribution on miRNA genes is affected in the *prp40ab* mutant**

**a**, Metagenome analysis of RNAPII distribution on pre-miRNA coding regions based on ChIPseq data **b**, Box plot showing the RNAPII occupancy on pre-miRNA coding regions based on ChIPseq data. **c**, Scatter plot showing changes in RNAPII occupancy on pre-miRNA coding regions relative to changes in the levels of polyadenylated *MIR* transcripts in *prp40ab*. **d**, Box plot showing changes in the levels of polyadenylated *MIR* transcripts in *prp40ab* depending on a change in the RNAPII level in pre-miRNA coding regions. Mann–Whitney U test p value: \* < 0.05; \*\*\* < 0.001. The box is drawn between the first and third quartiles, with an additional line drawn along the second quartile to mark the median. “X” indicates for mean. Whiskers indicate the minimums and maximums outside the first and third quartiles. The shaded area around each curve on metaplots indicates standard errors.

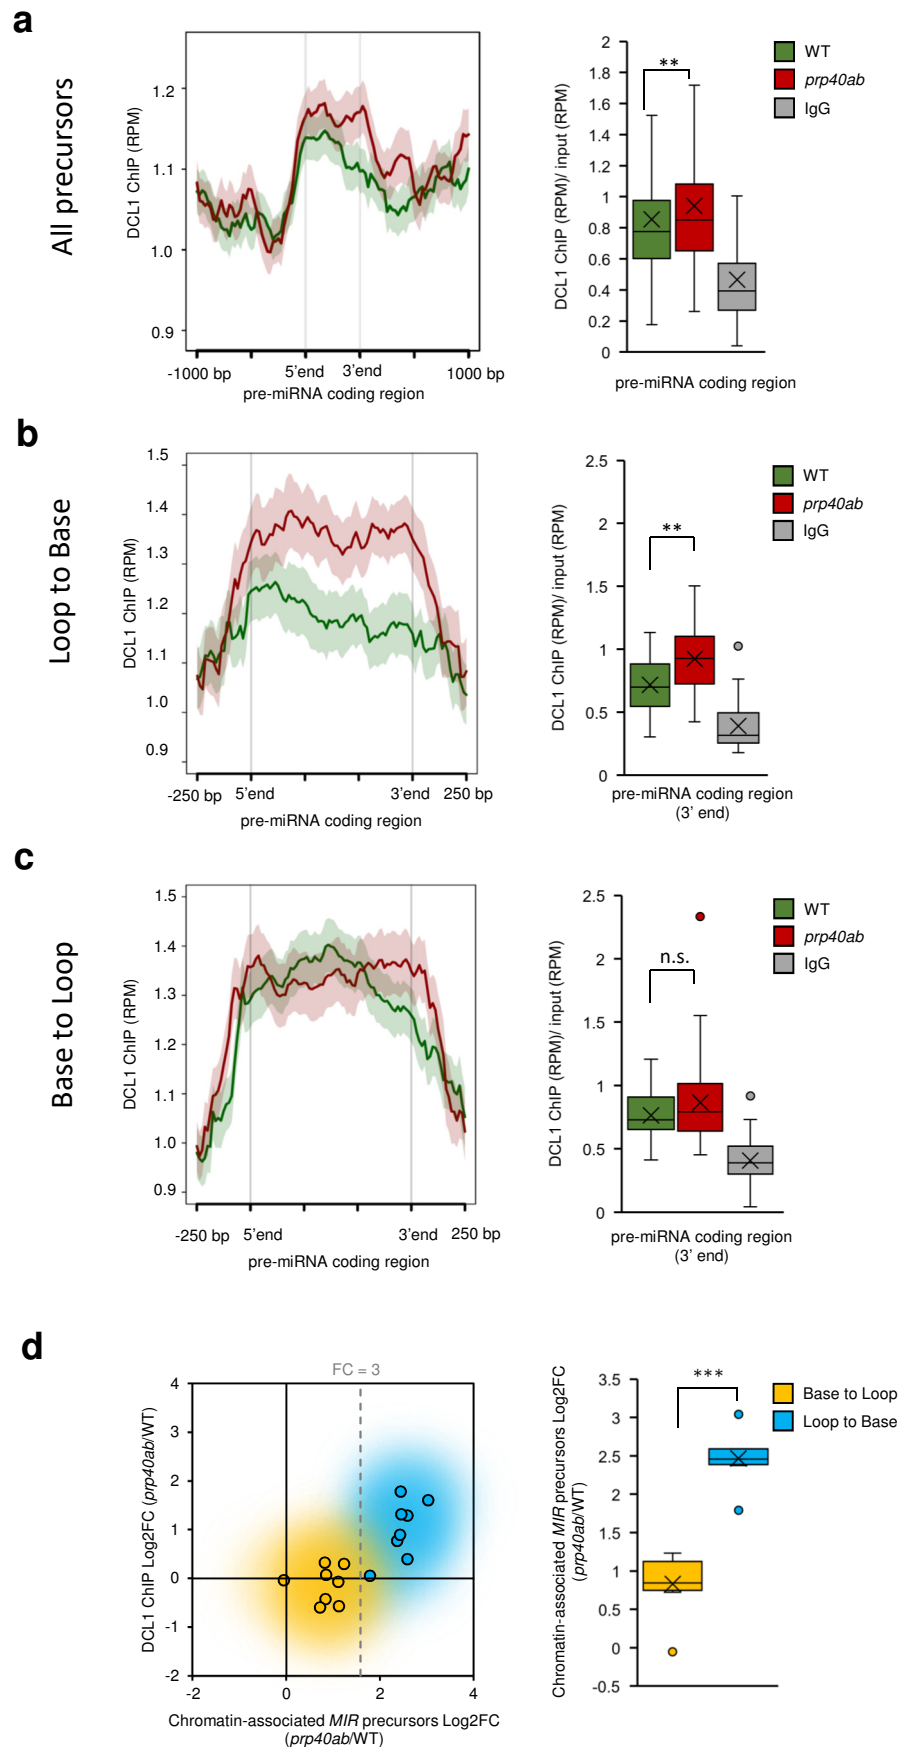

**Fig. 5 DCL1 distribution on miRNA genes is affected in the *prp40ab* mutant**

**a**, DCL1 distribution on pre-miRNA coding regions based on ChIPseq data. **b**, DCL1 distribution on loop-to-base-type miRNA genes. **c**, DCL1 distribution on base-to-loop-type miRNA genes. **d**, The level of chromatin-associated *MIR* transcripts relative to the level of DCL1 on pre-miRNA coding regions depending on the miRNA gene type. Mann–Whitney U test p value: \*\* < 0.01; \*\*\* < 0.001. The box is drawn between the first and third quartiles, with an additional line drawn along the second quartile to mark the median. “X” indicates for mean. Whiskers indicate the minimums and maximums outside the first and third quartiles. The shaded area around each curve on metaplots indicates standard errors.

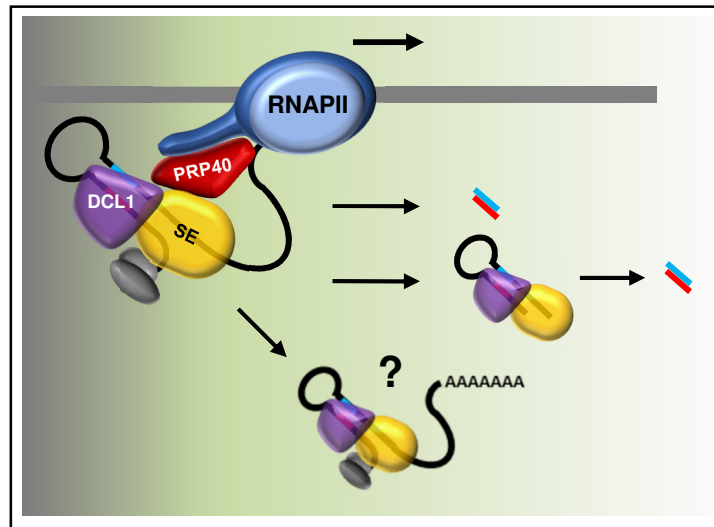

**Fig. 6 Cotranscriptional microprocessor assembly, regulated by AtPRP40, impacts RNAPII activity and is required for correct miRNA production**

In WT plants, when AtPRP40 is present, SE and DCL1 are recruited to miRNA genes, primary precursors are efficiently processed to pre-miRNAs (hairpin structures) and further to miRNAs, and RNAPII fluently moves through the pre-miRNA coding region. In the case of loop-to-base-type miRNA genes, both processing steps occur cotranscriptionally, and the miRNA/miRNA\* duplex is released to the nucleoplasm. For base-to-loop-type miRNA genes, only the first step is cotranscriptional, and the second cleavage step takes place in the nucleoplasm. Whether the polyadenylated pri-miRNAs that are released from chromatin can be post-transcriptionally processed needs to be verified.
